# Supplementary material
Source: HighWire-hosted journal article supplement (https://cmaj.ca/highwire/filestream/81736/field_highwire_adjunct_files/5/202392-res-6-at.pdf)
Supplement: 202392-res-6-at.pdf [file 202392-res-6-at.pdf]

**Supplementary Appendix 6: Full Regression Models for Primary Outcome Analysis**

| <b>Variable</b>                                         | <b>Primary Model</b> | <b>Additionally Adjusted Model</b> |
|---------------------------------------------------------|----------------------|------------------------------------|
| Intercept                                               | 0 (0 to 0.01)        | 0 (0 to 0)                         |
| Cannabis (Yes)                                          | 2.07 (1.12 to 3.82)  | 3.54 (1.13 to 11.05)               |
| Male Sex                                                | 1 (0.52 to 1.93)     | 1.67 (0.91 to 3.06)                |
| Race: Black, non-Hispanic                               | 0.68 (0.33 to 1.39)  | 0.74 (0.22 to 2.44)                |
| Race: Hispanic                                          | 1.65 (0.84 to 3.21)  | 1.25 (0.4 to 3.9)                  |
| Race: Other, non-Hispanic                               | 2.77 (0.91 to 8.4)   | 0.66 (0.13 to 3.32)                |
| Race: Multiracial, non-Hispanic                         | 0.51 (0.19 to 1.35)  | 0.11 (0.02 to 0.59)                |
| Age: 25 to 34                                           | 0.5 (0.18 to 1.37)   | 0.33 (0.07 to 1.59)                |
| Age: 35 to 44                                           | 1.9 (0.64 to 5.69)   | 1.17 (0.29 to 4.73)                |
| BMI: Normal Weight                                      | 1.2 (0.2 to 7.09)    | 0.82 (0.11 to 6.11)                |
| BMI: Overweight                                         | 1.23 (0.26 to 5.92)  | 2.12 (0.27 to 16.39)               |
| BMI: Obese                                              | 1.99 (0.4 to 9.89)   | 1.43 (0.16 to 12.98)               |
| Education: Completed Highschool                         | 1.44 (0.73 to 2.84)  | 6.39 (1.89 to 21.54)               |
| Education: Some College                                 | 0.63 (0.27 to 1.48)  | 2.57 (0.78 to 8.44)                |
| Education: Completed College                            | 0.85 (0.3 to 2.39)   | 9.3 (2.49 to 34.7)                 |
| Income: \$15,000 to less than \$25,000                  | 0.85 (0.43 to 1.66)  | 1.88 (0.66 to 5.32)                |
| Income: \$25,000 to less than \$35,000                  | 1.15 (0.54 to 2.46)  | 0.44 (0.13 to 1.47)                |
| Income: \$35,000 to less than \$50,000                  | 0.36 (0.17 to 0.77)  | 0.64 (0.19 to 2.18)                |
| Income: \$50,000 or more                                | 0.93 (0.29 to 2.91)  | 0.55 (0.18 to 1.67)                |
| Jurisdiction Legal Status: Limited Medical Use only     | 1.01 (0.65 to 1.57)  | 0.72 (0.33 to 1.54)                |
| Jurisdiction Legal Status: Recreational and Medical Use | 0.72 (0.37 to 1.38)  | 0.78 (0.32 to 1.87)                |
| Marital status: Married                                 | 0.68 (0.36 to 1.29)  | 2.22 (0.85 to 5.78)                |
| Marital status: Divorced                                | 0.96 (0.47 to 1.96)  | 1.94 (0.67 to 5.63)                |
| Marital status: Widowed                                 | 4.35 (1.79 to 10.61) | 19.86 (4.16 to 94.82)              |
| Marital status: Separated                               | 2.59 (0.92 to 7.3)   | 3.75 (0.45 to 31.37)               |
| Active health coverage                                  | 1.41 (0.81 to 2.46)  | 1.06 (0.44 to 2.54)                |
| Smoking status: Current                                 | 2.56 (1.56 to 4.21)  | 5.14 (1.4 to 18.87)                |
| Smoking status: Former                                  | 1.77 (0.99 to 3.15)  | 3.61 (1.21 to 10.75)               |
| Current smokeless tobacco user                          | 1.88 (1 to 3.5)      | 1.45 (0.34 to 6.22)                |
| E-cigarette use status: Current                         | 0.81 (0.33 to 1.96)  | 0.83 (0.24 to 2.9)                 |
| E-cigarette use status: Former                          | 1.03 (0.55 to 1.91)  | 1.33 (0.52 to 3.44)                |
| Heavy Drinker                                           | 1.41 (0.66 to 3.02)  | 0.51 (0.19 to 1.39)                |
| Sedentary lifestyle                                     | 1.94 (0.83 to 4.49)  | 1.32 (0.58 to 2.99)                |
| Kidney disease                                          | 3.87 (1.64 to 9.14)  | 1.69 (0.44 to 6.54)                |
| Diabetes                                                | 2.48 (1.42 to 4.33)  | 1.58 (0.61 to 4.08)                |
| Hypertension (2017 only)                                | --                   | 2.51 (1.16 to 5.41)                |
| High Cholesterol (2017 only)                            | --                   | 1.02 (0.51 to 2.01)                |
